# Supplementary material for: A new optical/electrochemical Na+ sensor based on platinum(ii) complexes containing crown ether annelated dithiolate ligands
Source: Royal Society of Chemistry journal article supplement (doi:10.1039/b719997j), 2008-01-01
Supplement: b719997j.pdf [file b719997j.pdf]

*Electronic Supplementary Information*

**A New optical/electrochemical Na<sup>+</sup> Sensor Based on Platinum(II)  
Complexes Containing Crown Ether Annelated Dithiolate Ligands**

Yong Ji, Rui Zhang, Xiao-Bo Du, Jing-Lin Zuo\* and Xiao-Zeng You

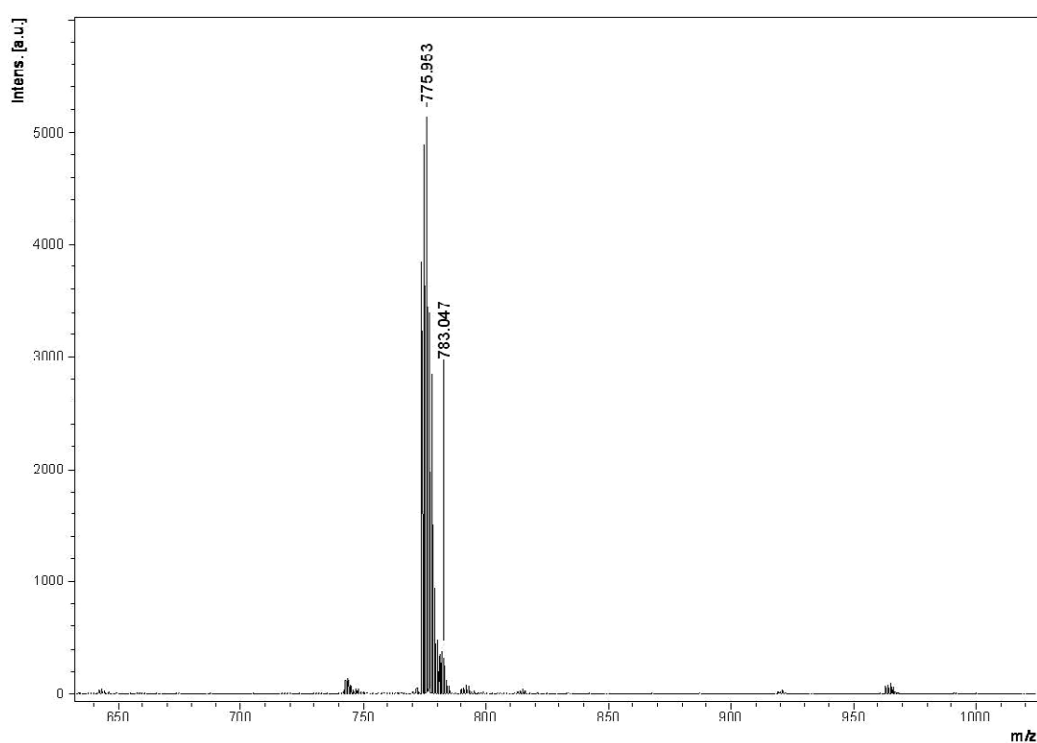

---

\* To whom correspondence should be addressed. Email: zuojl@nju.edu.cn  
Fax: +86-25-83314502.  
Nanjing University.

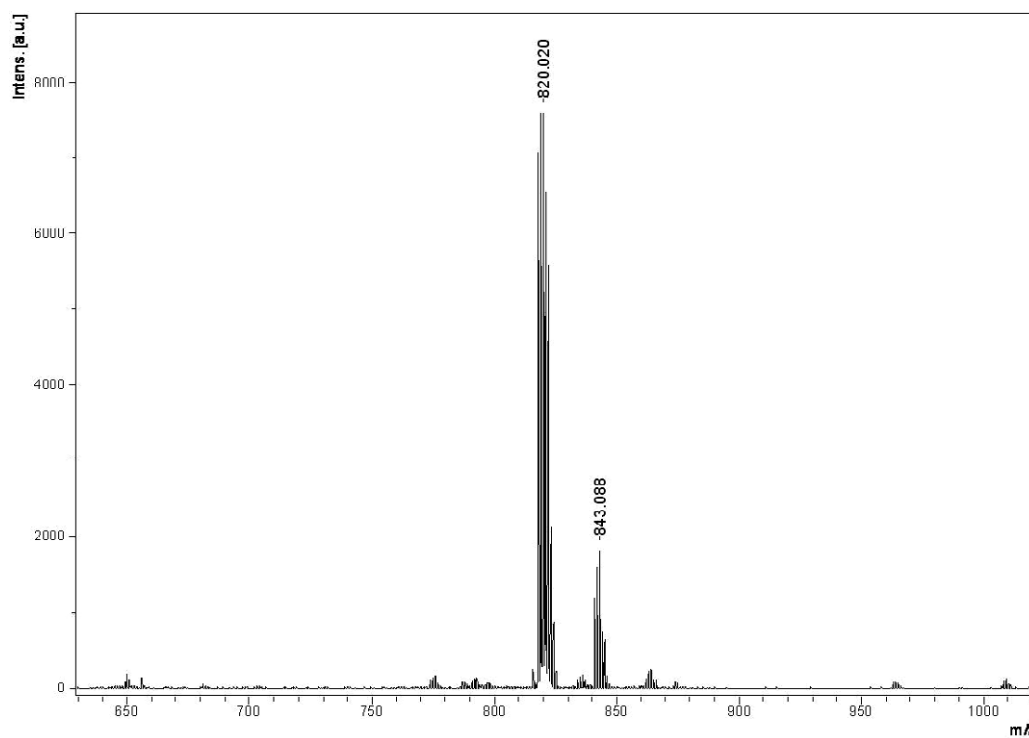

**Fig. S1** MS spectra of complex **1** upon addition of  $\text{LiClO}_4$  (top) and complex **2** upon addition of  $\text{NaClO}_4$  (down).

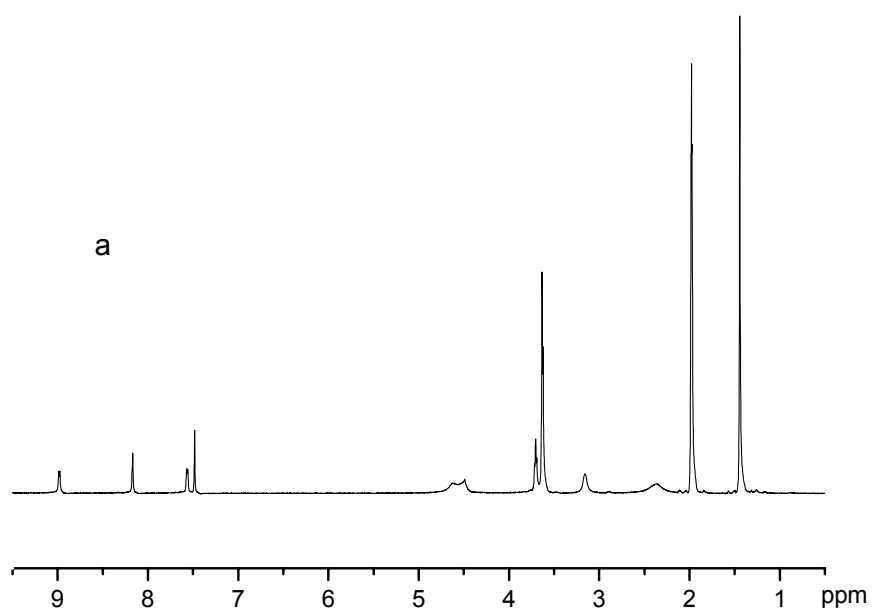

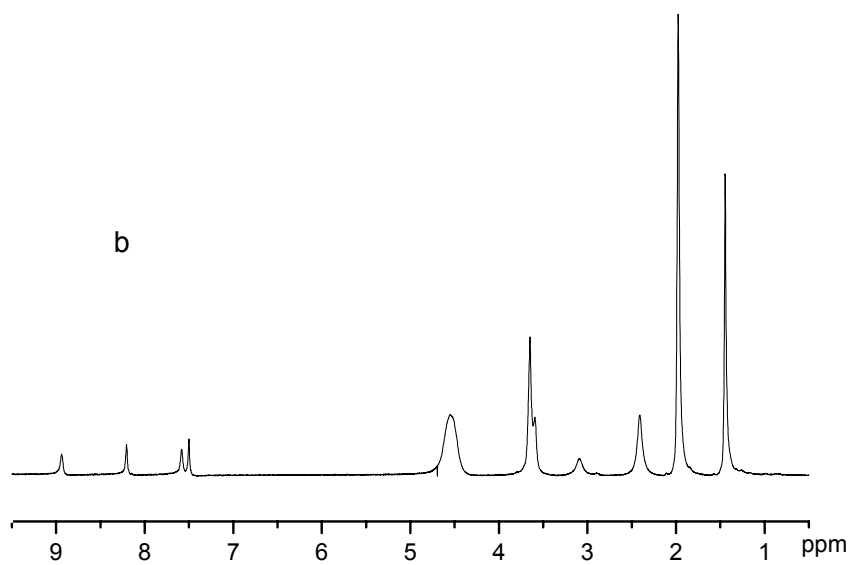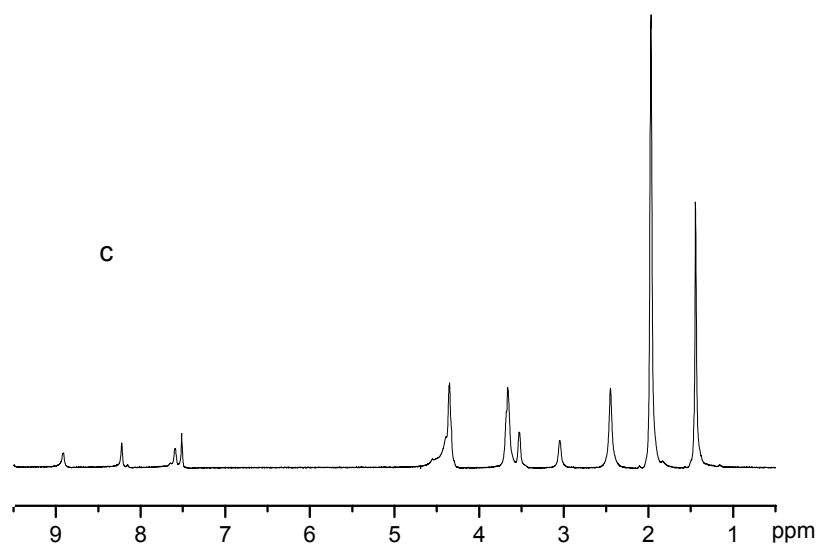

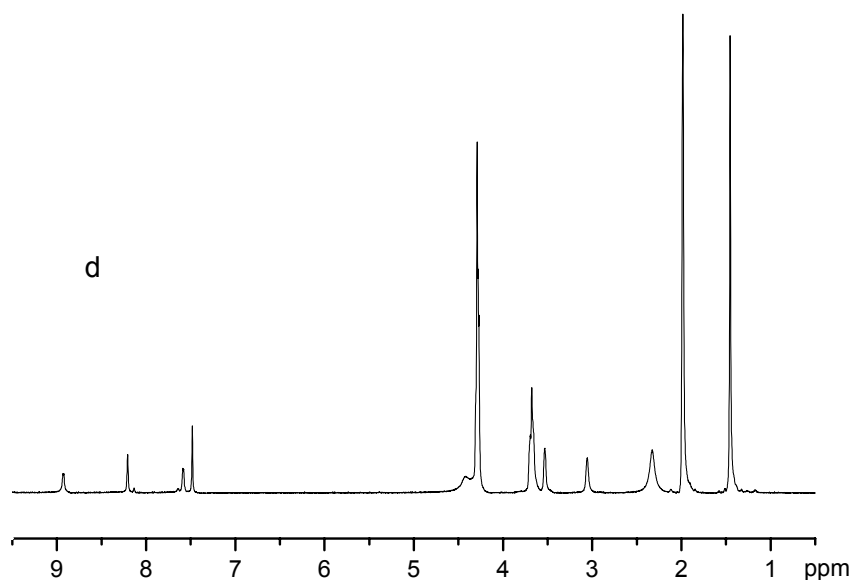

**Fig. S2** <sup>1</sup>H NMR spectra of complex **2** with different Na<sup>+</sup> concentrations (a) 0, (b) 1, (c) 5, (d) 10 eq. NaClO<sub>4</sub> in CDCl<sub>3</sub>/CD<sub>3</sub>CN (1:1, v/v).

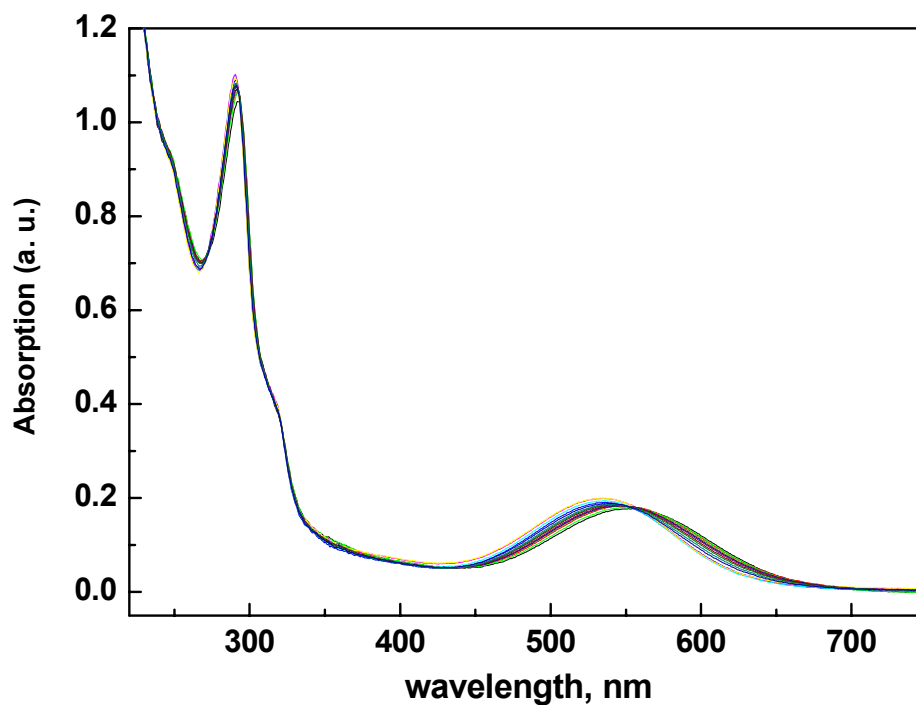

**Fig. S3** UV-vis absorption spectral changes of complex **2** (concentration =  $4 \times 10^{-5}$  mol dm<sup>-3</sup>) in acetonitrile upon addition of KPF<sub>6</sub>.

**Table S1.** Absorption bands for complex **2** as a function of different solvents.

| solvents                        | UV-vis $\lambda_{\text{max}}$ , nm | $\epsilon$ , $10^4 \text{ M}^{-1} \text{ cm}^{-1}$ |
|---------------------------------|------------------------------------|----------------------------------------------------|
| CH <sub>3</sub> CN              | 555                                | 0.824                                              |
|                                 | 292                                | 4.527                                              |
| DMF                             | 567                                | 0.622                                              |
|                                 | 297                                | 3.632                                              |
| CH <sub>2</sub> Cl <sub>2</sub> | 586                                | 0.841                                              |
|                                 | 298                                | 4.708                                              |
| CHCl <sub>3</sub>               | 594                                | 0.831                                              |
|                                 | 298                                | 4.224                                              |
